# Supplementary material
Source: PubMed Central journal article supplement (PMC4784479)
Supplement: NIHMS764563-supplement-Table_2.pdf [file NIHMS764563-supplement-Table_2.pdf]

Table II: Ligand-CRT docking characteristics

| Ligand <sup>a</sup>                         | Docking energy (kcal/mol) | Interacting residues |                     | Distance (Å) | Chemical bond <sup>d</sup> |
|---------------------------------------------|---------------------------|----------------------|---------------------|--------------|----------------------------|
|                                             |                           | CRT <sup>b</sup>     | Ligand <sup>c</sup> |              |                            |
| SE<br>( <sup>70</sup> QKRAA <sup>74</sup> ) | -207                      | Asp209               | R72                 | 3.5          | ES                         |
|                                             |                           | Asp209               | R72                 | 3.5          | ES                         |
|                                             |                           | Glu223               | K71                 | 3.2          | ES                         |
| HS(4-4)c Trp<br>(DKCLA)                     | -109                      | Glu257               | K                   | 2.1          | HB                         |
|                                             |                           | Glu257               | K                   | 2.6          | ES                         |
| HS(3-4)c Trp<br>(DKCLA)                     | -21.9                     | Asp209               | A                   | 1.8          | HB                         |
|                                             |                           | Glu223               | D                   | 2.1          | HB                         |
|                                             |                           | Gly256               | D                   | 2.1          | HB                         |

a, Core amino acid sequences are shown in parentheses; b, CRT residues are shown in a three-letter format. Numbers correspond to the location of the amino acid residue in the CRT sequence; c, ligand residues are shown in a single-letter format. Numbers correspond to the location of the amino acid residue in the DR $\beta$  chain sequence; d, ES, electrostatic; HB, hydrogen bond.
